# Supplementary material
Source: HighWire-hosted journal article supplement (https://bmjopen.bmj.com/content/10/6/e035673)
Supplement: inline-supplementary-material-1 [file inline-supplementary-material-1.pdf]

### The final ePRO questionnaire after adjustments

| Items graded by severity                                                                             | Response options*                                                                                                                                      |   |   |   |   |   |   |   |
|------------------------------------------------------------------------------------------------------|--------------------------------------------------------------------------------------------------------------------------------------------------------|---|---|---|---|---|---|---|
| <b>During the past week</b>                                                                          |                                                                                                                                                        |   |   |   |   |   |   |   |
| 1. How would you rate your overall health during the past week?                                      | Very poor <span style="float: right;">Excellent</span>                                                                                                 |   |   |   |   |   |   |   |
|                                                                                                      | <table border="1" style="width: 100%; text-align: center;"> <tr> <td>1</td><td>2</td><td>3</td><td>4</td><td>5</td><td>6</td><td>7</td> </tr> </table> | 1 | 2 | 3 | 4 | 5 | 6 | 7 |
| 1                                                                                                    | 2                                                                                                                                                      | 3 | 4 | 5 | 6 | 7 |   |   |
| 2. How would you rate your overall quality of life during the past week?                             | Very poor <span style="float: right;">Excellent</span>                                                                                                 |   |   |   |   |   |   |   |
|                                                                                                      | <table border="1" style="width: 100%; text-align: center;"> <tr> <td>1</td><td>2</td><td>3</td><td>4</td><td>5</td><td>6</td><td>7</td> </tr> </table> | 1 | 2 | 3 | 4 | 5 | 6 | 7 |
| 1                                                                                                    | 2                                                                                                                                                      | 3 | 4 | 5 | 6 | 7 |   |   |
| 3. Were you short of breath?                                                                         | Not at all A little Quite a bit Very Much                                                                                                              |   |   |   |   |   |   |   |
| 4. Have you had pain?                                                                                | <table border="1" style="width: 100%; text-align: center;"> <tr> <td>1</td><td>2</td><td>3</td><td>4</td> </tr> </table>                               | 1 | 2 | 3 | 4 |   |   |   |
| 1                                                                                                    | 2                                                                                                                                                      | 3 | 4 |   |   |   |   |   |
| 5. Were you tired?                                                                                   | <table border="1" style="width: 100%; text-align: center;"> <tr> <td>1</td><td>2</td><td>3</td><td>4</td> </tr> </table>                               | 1 | 2 | 3 | 4 |   |   |   |
| 1                                                                                                    | 2                                                                                                                                                      | 3 | 4 |   |   |   |   |   |
| 6. Have you lacked appetite?                                                                         | <table border="1" style="width: 100%; text-align: center;"> <tr> <td>1</td><td>2</td><td>3</td><td>4</td> </tr> </table>                               | 1 | 2 | 3 | 4 |   |   |   |
| 1                                                                                                    | 2                                                                                                                                                      | 3 | 4 |   |   |   |   |   |
| 7. How much did you cough?                                                                           | <table border="1" style="width: 100%; text-align: center;"> <tr> <td>1</td><td>2</td><td>3</td><td>4</td> </tr> </table>                               | 1 | 2 | 3 | 4 |   |   |   |
| 1                                                                                                    | 2                                                                                                                                                      | 3 | 4 |   |   |   |   |   |
| 8. Did you cough up blood?                                                                           | <table border="1" style="width: 100%; text-align: center;"> <tr> <td>1</td><td>2</td><td>3</td><td>4</td> </tr> </table>                               | 1 | 2 | 3 | 4 |   |   |   |
| 1                                                                                                    | 2                                                                                                                                                      | 3 | 4 |   |   |   |   |   |
| <b>Supplementary items</b>                                                                           |                                                                                                                                                        |   |   |   |   |   |   |   |
| 9. Do you feel feverish?                                                                             | No/yes                                                                                                                                                 |   |   |   |   |   |   |   |
|                                                                                                      | <i>If yes</i> ; Please measure your temperature and write the answer here (eg 38.5)                                                                    |   |   |   |   |   |   |   |
|                                                                                                      | <b>≥38.2</b>                                                                                                                                           |   |   |   |   |   |   |   |
|                                                                                                      | (Pop-up message advises the patient to contact the hospital)                                                                                           |   |   |   |   |   |   |   |
| 10.. Do you have a hoarse voice?                                                                     | No/yes                                                                                                                                                 |   |   |   |   |   |   |   |
|                                                                                                      | <i>If yes</i> ; Have your hoarse voice worsened during the past week?                                                                                  |   |   |   |   |   |   |   |
|                                                                                                      | <b>Yes</b>                                                                                                                                             |   |   |   |   |   |   |   |
| 11. Do you have facial swelling?                                                                     | No/Yes                                                                                                                                                 |   |   |   |   |   |   |   |
|                                                                                                      | <i>If yes</i> ; Have your facial swelling worsened during the past week?                                                                               |   |   |   |   |   |   |   |
|                                                                                                      | <b>Yes</b>                                                                                                                                             |   |   |   |   |   |   |   |
| 12. Do you sense a growing tumour?                                                                   | Yes/no/do not know                                                                                                                                     |   |   |   |   |   |   |   |
|                                                                                                      | <b>Yes</b>                                                                                                                                             |   |   |   |   |   |   |   |
| 13. How much do you weigh?                                                                           |                                                                                                                                                        |   |   |   |   |   |   |   |
|                                                                                                      | <b>≥ 3 kg weight loss compared to first measure</b>                                                                                                    |   |   |   |   |   |   |   |
| 14. In the past week, have you had other symptoms that you think may be associated with your cancer? |                                                                                                                                                        |   |   |   |   |   |   |   |
|                                                                                                      | <b>Any comment</b>                                                                                                                                     |   |   |   |   |   |   |   |

\*Threshold definitions are marked with grey/bold. Notifications are automatically sent to the department when the thresholds are exceeded.

Items 1 and 3-7: a notification is only sent to the department in case of deterioration compared to the previous week.

Item 2: No threshold is used for this item
